# Supplementary material for: Differentiating Branch Duct and Mixed IPMN in Endoscopically Collected Pancreatic Cyst Fluid via Cytokine Analysis
Source: Hindawi journal article supplement (doi:10.1155/2012/247309), 2012-01-01
Supplement: f2 [file 247309.f2.pdf]

**Supplemental Table 2:** Statistical analysis of IMPs detected in both BD-IPMN and mixed IPMN samples.

| Cytokine    | BD-IPMN              |        |        |       |       |        |        |         |         |        | Mixed IPMN           |        |        |         |        | p-value |
|-------------|----------------------|--------|--------|-------|-------|--------|--------|---------|---------|--------|----------------------|--------|--------|---------|--------|---------|
|             | Concentration, pg/ml |        |        |       |       |        |        |         |         |        | Concentration, pg/ml |        |        |         |        |         |
|             | Samples              |        |        |       |       | Median | IQR    | Samples |         |        |                      |        | Median | IQR     |        |         |
|             | B1                   | B2     | B3     | B4    | B5    |        |        | M1      | M2      | M3     | M4                   | M5     |        |         |        |         |
| 6CKine      | N.D.                 | N.D.   | 104.4  | N.D.  | N.D.  | 104.4  | 0.0    | N.D.    | 208.3   | 64.1   | N.D.                 | N.D.   | 40.5   | 64.1    | 83.9   | 0.6547  |
| BCA-1       | N.D.                 | N.D.   | 0.7    | N.D.  | N.D.  | 0.7    | 0.0    | N.D.    | 20.0    | 1.8    | N.D.                 | N.D.   | N.D.   | 10.9    | 9.1    | 0.2207  |
| CTACK       | N.D.                 | 1.0    | 2.7    | N.D.  | N.D.  | 1.9    | 0.9    | N.D.    | 0.9     | N.D.   | N.D.                 | N.D.   | N.D.   | 0.9     | 0.0    | 0.2207  |
| CXCL6       | N.D.                 | N.D.   | 32.3   | 7.4   | N.D.  | 19.8   | 12.4   | N.D.    | 2.1     | 4.3    | 16.2                 | 5.9    | 5.1    | 4.7     | 0.1649 |         |
| EGF         | 5.9                  | 363.7  | 1305.5 | N.D.  | N.D.  | 363.7  | 649.8  | 11620.2 | 47.4    | 19.0   | 108.9                | N.D.   | N.D.   | 78.1    | 2946.4 | 1.0000  |
| ENA-78      | N.D.                 | N.D.   | 2566.7 | 139.5 | N.D.  | 1353.1 | 1213.6 | N.D.    | 1082.8  | 43.1   | 369.7                | 279.4  | 324.6  | 327.6   | 0.6434 |         |
| Eotaxin     | 2.8                  | 18.6   | 18.2   | 8.6   | N.D.  | 13.4   | 11.1   | 12.3    | 38.6    | 24.0   | N.D.                 | N.D.   | N.D.   | 24.0    | 13.1   | 0.1573  |
| Eotaxin-2   | 13.7                 | 36.0   | 1741.8 | 8.0   | 117.9 | 36.0   | 104.2  | 147.5   | 2521.2  | 6666.7 | 12.8                 | 350.3  | 350.3  | 2373.7  | 0.1745 |         |
| FGF-basic   | N.D.                 | 54.5   | 39.8   | N.D.  | N.D.  | 47.1   | 7.3    | N.D.    | 201.5   | 45.7   | N.D.                 | N.D.   | N.D.   | 123.6   | 77.9   | 0.4386  |
| Fit-3L      | N.D.                 | 3.4    | N.D.   | N.D.  | N.D.  | 3.4    | 0.0    | N.D.    | 79.5    | 18.1   | N.D.                 | N.D.   | N.D.   | 48.8    | 30.7   | 0.2207  |
| Fractalkine | 26.0                 | 46.2   | 168.2  | 26.0  | 214.0 | 46.2   | 142.2  | 26.0    | 3120.0  | 533.1  | N.D.                 | 158.4  | 345.7  | 1054.5  | 0.2967 |         |
| G-CSF       | N.D.                 | 2.1    | 6.6    | 2.5   | N.D.  | 2.5    | 2.2    | N.D.    | 266.4   | 11.2   | N.D.                 | 8.8    | 11.2   | 128.8   | 0.0495 |         |
| GRO         | N.D.                 | 50.2   | 658.1  | 15.9  | 15.9  | 33.0   | 186.2  | 11.5    | 1174.4  | 383.1  | 603.4                | 243.4  | 383.1  | 360.0   | 0.4624 |         |
| GRO-a       | N.D.                 | 24.6   | 312.4  | 7.8   | 7.8   | 16.2   | 88.8   | 6.2     | 607.3   | 197.3  | 299.6                | 119.2  | 197.3  | 180.4   | 0.4624 |         |
| HCC-1       | N.D.                 | 171.8  | 818.7  | N.D.  | 39.2  | 171.8  | 389.7  | N.D.    | 1563.4  | 1705.9 | 15.7                 | 1316.4 | 1439.9 | 607.8   | 0.2888 |         |
| HGF         | 27.8                 | 144.1  | 474.3  | 20.3  | 12.6  | 27.8   | 123.8  | 329.1   | 4797.0  | 448.2  | 76.0                 | 40.6   | 329.1  | 372.2   | 0.1745 |         |
| ICAM-1      | 276.6                | 4492.5 | 5375.7 | 276.6 | 259.0 | 276.6  | 4215.9 | 18274.0 | 16409.0 | 4353.5 | 3938.1               | 654.3  | 4353.5 | 12470.9 | 0.1745 |         |
| IFN-a2      | N.D.                 | N.D.   | 12.9   | N.D.  | N.D.  | 12.9   | 0.0    | N.D.    | 312.2   | 51.5   | N.D.                 | N.D.   | N.D.   | 181.8   | 130.4  | 0.2207  |
| IFN-g       | N.D.                 | 2.3    | 1.1    | 1.4   | N.D.  | 1.4    | 0.6    | N.D.    | 236.0   | 14.3   | N.D.                 | 0.4    | 14.3   | 117.8   | 0.5127 |         |
| IL-10       | 0.2                  | 1.9    | 2.9    | N.D.  | N.D.  | 1.9    | 1.4    | N.D.    | 80.5    | 10.0   | 0.6                  | N.D.   | 10.0   | 40.0    | 0.2752 |         |
| IL-12p40    | N.D.                 | 17.5   | 7.0    | N.D.  | N.D.  | 12.2   | 5.2    | N.D.    | 946.1   | 63.3   | N.D.                 | N.D.   | 504.7  | 441.4   | 0.1213 |         |
| IL-12p70    | N.D.                 | N.D.   | 2.0    | N.D.  | N.D.  | 2.0    | 0.0    | N.D.    | 49.4    | 7.7    | N.D.                 | N.D.   | N.D.   | 28.6    | 20.8   | 0.2207  |
| IL-13       | N.D.                 | 12.2   | 5.5    | N.D.  | N.D.  | 8.8    | 3.3    | N.D.    | 211.5   | 11.5   | N.D.                 | 2.2    | 11.5   | 104.6   | 1.0000 |         |
| IL-15       | N.D.                 | 7.4    | N.D.   | N.D.  | N.D.  | 7.4    | 0.0    | N.D.    | 250.3   | 12.0   | N.D.                 | N.D.   | 131.2  | 119.1   | 0.2207 |         |
| IL-16       | 7.3                  | 11.8   | 28.1   | 20.2  | 2.4   | 11.8   | 12.9   | 16.1    | 270.1   | 18.2   | 11.8                 | N.D.   | 17.1   | 66.1    | 0.3913 |         |
| IL-18       | N.D.                 | 18.4   | 92.0   | N.D.  | N.D.  | 55.2   | 36.8   | N.D.    | 92.7    | 8.0    | N.D.                 | N.D.   | 50.3   | 42.4    | 1.0000 |         |
| IL-1a       | N.D.                 | 7.4    | 12.5   | N.D.  | N.D.  | 9.9    | 2.6    | 4.1     | 26.6    | 22.4   | N.D.                 | N.D.   | 22.4   | 11.2    | 0.5637 |         |
| IL-1b       | N.D.                 | 1.0    | N.D.   | N.D.  | N.D.  | 1.0    | 0.0    | N.D.    | 1140.2  | 8.6    | N.D.                 | N.D.   | 574.4  | 565.8   | 0.2207 |         |
| IL-1ra      | N.D.                 | 13.3   | 379.7  | N.D.  | N.D.  | 196.5  | 183.2  | N.D.    | 595.6   | 46.2   | N.D.                 | N.D.   | 320.9  | 274.7   | 0.4386 |         |
| IL-2        | N.D.                 | 1.2    | 2.1    | N.D.  | N.D.  | 1.6    | 0.5    | N.D.    | 288.2   | 14.3   | N.D.                 | N.D.   | 151.2  | 137.0   | 0.1213 |         |

|            |       |        |         |       |        |         |         |         |        |        |         |           |
|------------|-------|--------|---------|-------|--------|---------|---------|---------|--------|--------|---------|-----------|
| IL-20      | N.D.  | N.D.   | 50.2    | 0.0   | N.D.   | 442.7   | 232.1   | N.D.    | N.D.   | 337.4  | 105.3   | 0.2207    |
| IL-21      | N.D.  | 4.1    | N.D.    | 0.0   | N.D.   | 4.4     | N.D.    | N.D.    | N.D.   | 4.4    | 0.0     | 0.3173    |
| IL-23      | N.D.  | 18.3   | 30.2    | 5.9   | N.D.   | 273.8   | 42.0    | 188.8   | N.D.   | 124.3  | 154.8   | 0.0641 ** |
| IL-28A     | 2.9   | N.D.   | N.D.    | 0.0   | N.D.   | 25.7    | 4.4     | N.D.    | N.D.   | 15.1   | 10.6    | 0.2207    |
| IL-3       | N.D.  | 8.5    | N.D.    | 5.5   | 2.9    | 4.1     | N.D.    | N.D.    | N.D.   | 11.4   | 7.3     | 0.4386    |
| IL-33      | N.D.  | N.D.   | 16.3    | 0.0   | N.D.   | 19.3    | 16.3    | N.D.    | N.D.   | 17.8   | 1.5     | 0.5403    |
| IL-4       | N.D.  | 2.2    | 0.7     | 7.9   | 2.2    | 351.2   | 9.4     | N.D.    | N.D.   | 180.3  | 170.9   | 0.2482    |
| IL-6       | N.D.  | 5.4    | 21.9    | 13.6  | 8.2    | 211.5   | 33.7    | N.D.    | N.D.   | 122.6  | 88.9    | 0.1213    |
| IL-7       | N.D.  | 3.5    | 27.0    | 3.5   | 12.1   | 138.0   | 23.6    | 5.1     | 9.1    | 16.3   | 44.1    | 0.2888    |
| IL-8       | 9.3   | 7.7    | 617.7   | 9.3   | 305.0  | 9160.5  | 3067.2  | 14.0    | 5.7    | 23.3   | 3053.3  | 0.4561    |
| IP-10      | 6.1   | 24.2   | 106.0   | 15.1  | 38.9   | 1457.4  | 419.8   | 11.3    | N.D.   | 215.6  | 668.8   | 0.2482    |
| I-TAC      | N.D.  | 0.9    | 373.7   | 187.3 | 186.4  | 9.6     | 11.9    | 16.0    | 1.3    | 10.8   | 5.4     | 1.0000    |
| LIF        | N.D.  | 15.0   | N.D.    | 15.0  | 0.0    | 224.2   | N.D.    | N.D.    | N.D.   | 224.2  | 0.0     | 0.3173    |
| MCP-1      | 65.0  | 2591.2 | 631.6   | 2.3   | 1.0    | 4800.4  | 5965.9  | 153.2   | 10.8   | 322.9  | 4647.2  | 0.2506    |
| MCP-2      | N.D.  | N.D.   | 5.8     | 0.0   | N.D.   | 20.5    | 25.9    | N.D.    | N.D.   | 23.2   | 2.7     | 0.2207    |
| MCP-3      | 4.3   | 5.7    | 11.4    | 2.0   | 2.0    | 133.3   | 76.2    | 2.0     | 4.3    | 40.3   | 86.7    | 0.3913    |
| MCP-4      | N.D.  | N.D.   | 31.8    | 0.0   | N.D.   | 126.5   | 162.9   | N.D.    | N.D.   | 144.7  | 18.2    | 0.2207    |
| M-CSF      | 15.4  | N.D.   | N.D.    | 14.8  | 0.6    | 53.8    | N.D.    | N.D.    | N.D.   | 32.9   | 20.9    | 1.0000    |
| MDC        | N.D.  | 6.1    | 29.5    | 17.8  | 11.7   | 585.8   | 82.6    | N.D.    | N.D.   | 334.2  | 251.6   | 0.1213    |
| MIF        | 162.8 | 598.6  | 12262.0 | 293.7 | 435.8  | 24973.9 | 11500.4 | 78.5    | 3863.1 | 3863.1 | 11409.3 | 0.6015    |
| MIG        | N.D.  | 42.0   | 194.8   | 16.2  | 89.3   | 2021.2  | 3912.9  | 54.1    | 82.4   | 143.8  | 1938.8  | 0.1797    |
| MIP-1a     | N.D.  | 7.7    | 13.2    | N.D.  | 2.7    | 320.6   | 24.1    | N.D.    | N.D.   | 172.3  | 148.2   | 0.1213    |
| MIP-1b     | N.D.  | 32.9   | 31.4    | N.D.  | 0.7    | 308.4   | 53.5    | N.D.    | N.D.   | 53.5   | 144.1   | 0.5637    |
| MIP-1d     | N.D.  | N.D.   | N.D.    | 96.2  | 0.0    | 2909.5  | 22.1    | N.D.    | 63.4   | 63.4   | 1443.7  | 0.6547    |
| MIP-3a     | N.D.  | N.D.   | 47.3    | N.D.  | 0.0    | 72.1    | 12.7    | 3.5     | 4.3    | 8.5    | 23.4    | 0.4795    |
| MIP-3b     | N.D.  | N.D.   | 2.1     | N.D.  | 0.0    | 2.7     | N.D.    | N.D.    | N.D.   | 2.7    | 0.0     | 0.3173    |
| NAP-2      | N.D.  | 2236.6 | 5415.8  | N.D.  | 3826.2 | 1589.6  | N.D.    | N.D.    | 6116.7 | 4167.0 | 1949.7  | 1.0000    |
| PDGF-AA    | 152.6 | 9544.1 | 9784.4  | 35.4  | 130.3  | 152.6   | 9413.8  | 10457.0 | 276.9  | 7842.8 | 7411.8  | 0.3472    |
| PDGF-AB/BB | 16.2  | 279.7  | 589.2   | 31.2  | 9.7    | 371.0   | 64.9    | 15.7    | 116.2  | 70.5   | 51.3    | 0.7540    |
| PDGF-BB    | 15.3  | 90.4   | 396.9   | 29.2  | 8.5    | 50.1    | 36.9    | 12.6    | 66.4   | 50.1   | 14.0    | 0.9168    |
| Rantes     | 3.4   | 218.4  | 1621.1  | N.D.  | N.D.   | 81.0    | 53.2    | N.D.    | 980.0  | 67.1   | 265.5   | 0.4795    |
| sCD40L     | N.D.  | 86.2   | 243.4   | 1.9   | N.D.   | 23.9    | 111.4   | 1.9     | 55.9   | 23.9   | 54.0    | 0.4561    |
| SCGF-b     | 69.5  | 990.9  | 481.7   | 613.5 | N.D.   | 3290.4  | 1456.6  | 14.3    | N.D.   | 1493.1 | 873.7   | 0.2482    |
| SDF-1a     | 54.3  | 59.1   | 338.1   | 76.2  | 38.5   | 260.6   | 49.2    | 38.5    | 4.8    | 49.2   | 10.7    | 0.2101    |
| SDF-1a+b   | N.D.  | 452.5  | 427.3   | 78.1  | N.D.   | 407.7   | 175.7   | N.D.    | N.D.   | 175.7  | 168.8   | 0.2752    |
| sIL-2Ra    | N.D.  | 7.6    | N.D.    | N.D.  | 0.0    | 212.3   | 17.7    | N.D.    | N.D.   | 115.0  | 97.3    | 0.2207    |

|               |      |      |       |      |      |      |       |      |       |        |      |       |       |       |           |
|---------------|------|------|-------|------|------|------|-------|------|-------|--------|------|-------|-------|-------|-----------|
| TARC          | N.D. | 0.4  | 2.8   | N.D. | N.D. | 1.6  | 1.2   | 0.4  | 5.3   | 2.0    | N.D. | 0.8   | 1.4   | 2.1   | 0.8170    |
| TGF- $\alpha$ | N.D. | N.D. | 7.3   | N.D. | 1.3  | 4.3  | 3.0   | N.D. | 32.7  | 4.8    | N.D. | 1.9   | 4.8   | 15.4  | 0.5637    |
| TNF- $\alpha$ | N.D. | N.D. | 1.4   | N.D. | N.D. | 1.4  | 0.0   | N.D. | 0.6   | 2.8    | N.D. | N.D.  | 1.7   | 1.1   | 1.0000    |
| TRAIL         | N.D. | 2.0  | 49.3  | N.D. | 51.6 | 49.3 | 24.8  | 1.0  | 64.8  | 20.5   | 20.4 | 13.7  | 20.4  | 6.9   | 0.6547    |
| VCAM-1        | N.D. | 18.7 | 555.2 | 18.1 | 18.2 | 18.5 | 134.6 | N.D. | 618.5 | 1026.9 | N.D. | 539.2 | 618.5 | 243.9 | 0.0771 ** |
| VEGF          | N.D. | 37.3 | 650.4 | N.D. | 14.0 | 37.3 | 318.2 | N.D. | 881.2 | 622.9  | 19.1 | 386.2 | 504.6 | 393.1 | 0.4795    |

IQR, interquartile range; \* = p-value<0.05; \*\* = p-value<0.1
